# Supplementary material for: Lurasidone compared to other atypical antipsychotic monotherapies for adolescent schizophrenia: a systematic literature review and network meta-analysis
Source: PubMed Central journal article supplement (PMC7497364; doi:10.1007/s00787-019-01425-2), 2019-11-22
Supplement: 787_2019_1425_MOESM1_ESM.pdf [file 787_2019_1425_MOESM1_ESM.pdf]

## **Appendix 1. Systematic Literature Review**

The systematic literature review followed methods outlined in guidelines published by the Cochrane Collaboration [1] and National Institute for Health and Care Excellence (NICE) [2]. NICE has a rigorous and clearly specified approach to systematic literature reviews. A review conducted to a standard suitable for NICE can be considered sufficient by health technology assessment agencies in other countries.

The scope of the search strategy was defined in terms of Population, Intervention, Comparison, Outcome Measures, and Study Design (PICOS) criteria. The PICOS statement is listed in Table 1.

The OvidSP platform was used to conduct the searches. This is a search platform that provides standardized access to a wide range of clinical literature databases and is an accepted tool for use in systematic literature reviews. The following databases were searched to identify relevant published studies:

- Embase (1988 to 2016 Week 13)
- Ovid MEDLINE® In Process & Other Non-Indexed Citations and Ovid MEDLINE® (1946 to present)
- Cochrane Library: EBM Reviews – Database of Abstracts of Reviews of Effects (DARE) (1991 to 1st Quarter)

The search strategy followed the structure outlined in Table 2.

The studies were reviewed based on specified inclusion and exclusion criteria. These criteria aligned with PICOS and are listed in Table 3. The specific search terms used and number of articles identified by each search term in each database are listed

in Tables 4, 5, and 6. Twenty-five full text articles were assessed for eligibility. Table 7 lists the 13 studies [3-15] that were excluded after reviewing the full text articles and details the specific reasons for exclusion. Figure 1 presents a graphical outline of the final network of evidence without taking into account the availability of specific outcome measures.

## References

1. Higgins JPT, Green S (2011) Cochrane handbook for systematic reviews of interventions version 5.1.0. <http://handbook-5-1.cochrane.org>. Accessed 1 February 2019
2. Dias S, Welton NJ, Sutton AJ, Ades A (2011) NICE DSU technical support document 2: A generalised linear modelling framework for pairwise and network meta-analysis of randomised controlled trials. NICE Decision Support Unit. [https://www.ncbi.nlm.nih.gov/books/NBK310366/pdf/Bookshelf\\_NBK310366.pdf](https://www.ncbi.nlm.nih.gov/books/NBK310366/pdf/Bookshelf_NBK310366.pdf). Accessed 1 February 2019
3. Findling RL, Cavus I, Pappadolulos E, Backinsky M, Schwartz JH, Vanderburg DG (2010) A placebo-controlled trial to evaluate the efficacy and safety of flexibly dosed oral ziprasidone in adolescent subjects with schizophrenia. 2nd Biennial Schizophrenia International Research Society Conference, Florence Italy April 14 2010. *Schizophr Res* 117:437
4. Robinson DG, Gallego JA, John M, Petrides G, Hassoun Y, Zhang J-P, et al (2015) A randomized comparison of aripiprazole and risperidone for the acute treatment of first-episode schizophrenia and related disorders: 3-month outcomes. *Schizophr Bull* 41:1227-1236
5. Kemp DE, Correll CU, Tohen M, DelBello MP, Ganocy SJ, Findling RL, et al (2013) Associations among obesity, acute weight gain, and response to treatment with olanzapine in adolescent schizophrenia. *J Child Adolesc Psychopharmacol* 23:522-530

6. Huffman GB (1997) Efficacy of clozapine for schizophrenia in children. *American Family Physician* 55:1356
7. Kumra S. Is there a role for clozapine in children and adolescents with schizophrenia? 2nd Biennial Schizophrenia International Research Society Conference, Florence Italy April 14 2010. *Schizophr Res* 117:166
8. McCormack PL (2010) Olanzapine: In adolescents with schizophrenia or bipolar I disorder. *CNS Drugs* 24: 443-452
9. Whitehead RE, Wisniewski SR, Ali M, Jin N, Kim E, Nyilas M, et al (2009) Patient assessed quality of life versus clinician assessment: A post-hoc analysis of a trial of aripiprazole in adolescent patients with schizophrenia. The 49th Annual National Institute of Mental Health (NIMH) New Clinical Drug Evaluation Unit (NCDEU) Meeting, Hollywood, Florida, June 29 2009. *J Child Adolesc Psychopharmacol* 19(6):1
10. Mathew S, Pikalov A, McQuade RD, Carson WH, Nyilas M, Forbes RA, et al (2009) Somnolence and sedation in adolescent patients with schizophrenia treated with aripiprazole in an acute study with long-term follow-up. The 49th Annual National Institute of Mental Health (NIMH) New Clinical Drug Evaluation Unit (NCDEU) Meeting, Hollywood, Florida, June 29 2009. *J Child Adolesc Psychopharmacol* 19(6):1
11. Kryzhanovskaya LA, Robertson-Plouch CK, Xu W, Carlson JL, Merida KM, Dittmann RW (2009) The safety of olanzapine in adolescents with schizophrenia or bipolar I disorder: a pooled analysis of 4 clinical trials. *J Clin Psychiatry* 70:247-258

12. Correll CU. Time course and relevance of early treatment response in adolescents with schizophrenia-spectrum disorders. 2nd Biennial Schizophrenia International Research Society Conference, Florence Italy April 14 2010. Schizophr Res 117:131-132
13. Gallego JA, Robinson DG, Sevy SM, Napolitano B, McCormack J, Lesser ML, et al (2011) Time to treatment response in first-episode schizophrenia: should acute treatment trials last several months? J Clin Psychiatry 72:1691-1696
14. Correll C, Murray S, Zhao J, Manos G, Mankoski R, Forbes R, et al (2010) Weight gain and metabolic changes in studies of aripiprazole for the treatment of pediatric bipolar I disorder and adolescent schizophrenia. 49th Annual Conference of the American College of Neuropsychopharmacology, Miami Beach, FL United States December 4 2010. Neuropsychopharmacology 35(Suppl 1):S387-388
15. Correll CU, Kohegyi E, Zhao C, Baker RA, McQuade R, Salzman P, et al (2014) Oral aripiprazole is an effective maintenance treatment in adolescents with schizophrenia: A randomized, double-blind, placebo-controlled trial. 53rd Annual Conference of the American College of Neuropsychopharmacology, Phoenix, AZ United States, December 7 2014. Neuropsychopharmacology 39(Suppl 1): S349-S350

Table 1. PICOS statement

| PICOS                        | Scope                                                                                                                                                                                                                                                                                                                                                                                                                                                                                                                                                                                                                                                                                                                                                                                                                                                                                                                                      |
|------------------------------|--------------------------------------------------------------------------------------------------------------------------------------------------------------------------------------------------------------------------------------------------------------------------------------------------------------------------------------------------------------------------------------------------------------------------------------------------------------------------------------------------------------------------------------------------------------------------------------------------------------------------------------------------------------------------------------------------------------------------------------------------------------------------------------------------------------------------------------------------------------------------------------------------------------------------------------------|
| Patient Population           | Humans 12-17 years of age with schizophrenia, including subsets of this age range                                                                                                                                                                                                                                                                                                                                                                                                                                                                                                                                                                                                                                                                                                                                                                                                                                                          |
| Intervention and Comparisons | Interventions: Lurasidone, aripiprazole, asenapine, clozapine, olanzapine, paliperidone, risperidone, quetiapine and ziprasidone<br>Comparisons: Placebo or any of the above interventions                                                                                                                                                                                                                                                                                                                                                                                                                                                                                                                                                                                                                                                                                                                                                 |
| Outcome Measures             | <ol style="list-style-type: none"> <li>1. Change from baseline in CGI-S scale</li> <li>2. Change from baseline in PANSS total score</li> <li>3. Response</li> <li>4. Relapse</li> <li>5. Change from baseline in weight</li> <li>6. Change from baseline in Body Mass Index (BMI)</li> <li>7. Change from baseline in fasting high-density lipoprotein (HDL) cholesterol</li> <li>8. Change from baseline in fasting low-density lipoprotein (LDL) cholesterol</li> <li>9. Change from baseline in fasting total cholesterol</li> <li>10. Change from baseline in fasting triglycerides</li> <li>11. Change from baseline in fasting serum glucose</li> <li>12. Discontinuation due to all causes</li> <li>13. Discontinuation due to lack of efficacy</li> <li>14. Discontinuation due to adverse events (AEs)</li> <li>15. Akathisia</li> <li>16. Extrapyramidal symptoms (EPS)</li> <li>17. Sedation</li> <li>18. Somnolence</li> </ol> |
| Study Design                 | Randomized controlled trials (RCTs) (including head-to-head and placebo-controlled trials)                                                                                                                                                                                                                                                                                                                                                                                                                                                                                                                                                                                                                                                                                                                                                                                                                                                 |
| Restrictions                 | Language: English                                                                                                                                                                                                                                                                                                                                                                                                                                                                                                                                                                                                                                                                                                                                                                                                                                                                                                                          |

Table 2: Structure of the Search Strategy

---

| <b>Clinical Evaluations</b> |
|-----------------------------|
| Disease terms               |
| <b>AND</b>                  |
| Intervention terms          |
| <b>AND</b>                  |
| Study Design terms          |
| <b>AND</b>                  |
| Population terms            |

---

Table 3. Inclusion and Exclusion Criteria

|                    | <b>Inclusion Criteria</b>                                                                                                                                                                                                                                                                                                                                                                                                                                                                                                                                                                                                                                                                                                                                                                                                                                                                                     | <b>Exclusion Criteria</b>                                                              |
|--------------------|---------------------------------------------------------------------------------------------------------------------------------------------------------------------------------------------------------------------------------------------------------------------------------------------------------------------------------------------------------------------------------------------------------------------------------------------------------------------------------------------------------------------------------------------------------------------------------------------------------------------------------------------------------------------------------------------------------------------------------------------------------------------------------------------------------------------------------------------------------------------------------------------------------------|----------------------------------------------------------------------------------------|
| Patient Population | Humans 12-17 years of age with schizophrenia, including subsets of this age range                                                                                                                                                                                                                                                                                                                                                                                                                                                                                                                                                                                                                                                                                                                                                                                                                             | Non-humans, non-schizophrenic patients, patients not within this age range or a subset |
| Interventions      | <ul style="list-style-type: none"> <li>• Lurasidone</li> <li>• Aripiprazole</li> <li>• Asenapine</li> <li>• Clozapine</li> <li>• Olanzapine</li> <li>• Paliperidone</li> <li>• Risperidone</li> <li>• Quetiapine</li> <li>• Ziprasidone</li> </ul>                                                                                                                                                                                                                                                                                                                                                                                                                                                                                                                                                                                                                                                            | Any treatments other than those listed in inclusion criteria                           |
| Comparators        | Any of the above listed interventions and placebo                                                                                                                                                                                                                                                                                                                                                                                                                                                                                                                                                                                                                                                                                                                                                                                                                                                             | Comparators other than those listed in the inclusion criteria                          |
| Outcome Measures   | <ul style="list-style-type: none"> <li>• Change from baseline in CGI-S scale</li> <li>• Change from baseline in PANSS total score</li> <li>• Response</li> <li>• Relapse</li> <li>• Change from baseline in weight</li> <li>• Change from baseline in Body Mass Index (BMI)</li> <li>• Change from baseline in fasting high-density lipoprotein (HDL) cholesterol</li> <li>• Change from baseline in fasting low-density lipoprotein (LDL) cholesterol</li> <li>• Change from baseline in fasting total cholesterol</li> <li>• Change from baseline in fasting triglycerides</li> <li>• Change from baseline in fasting serum glucose</li> <li>• Discontinuation due to all causes</li> <li>• Discontinuation due to lack of efficacy</li> <li>• Discontinuation due to adverse events (AEs)</li> <li>• Akathisia</li> <li>• Extrapyrimal symptoms (EPS)</li> <li>• Sedation</li> <li>• Somnolence</li> </ul> | Outcome measures other than those listed in the inclusion criteria                     |
| Study design       | Randomized controlled trials (RCTs) (including head-to-head and placebo-controlled trials)                                                                                                                                                                                                                                                                                                                                                                                                                                                                                                                                                                                                                                                                                                                                                                                                                    | Non-randomized controlled trials                                                       |
| Restrictions       | English language studies                                                                                                                                                                                                                                                                                                                                                                                                                                                                                                                                                                                                                                                                                                                                                                                                                                                                                      | Non-English language studies                                                           |



Table 4. Clinical Search Terms - Embase

| #  | Search String                                | Hits      |
|----|----------------------------------------------|-----------|
| 1  | exp schizophrenia/                           | 129,856   |
| 2  | schizophrenia.mp.                            | 141,500   |
| 3  | 1 or 2                                       | 144,306   |
| 4  | lurasidone.mp.                               | 838       |
| 5  | aripiprazole.mp.                             | 11,225    |
| 6  | asenapine.mp.                                | 986       |
| 7  | clozapine.mp.                                | 27,390    |
| 8  | olanzapine.mp.                               | 28,533    |
| 9  | paliperidone.mp.                             | 2,833     |
| 10 | risperidone.mp.                              | 30,855    |
| 11 | quetiapine.mp.                               | 18,771    |
| 12 | ziprasidone.mp.                              | 7,854     |
| 13 | 4 or 5 or 6 or 7 or 8 or 9 or 10 or 11 or 12 | 65,474    |
| 14 | juvenile.mp.                                 | 87,621    |
| 15 | childhood onset.mp.                          | 5,444     |
| 16 | young adult.mp.                              | 146,614   |
| 17 | child*.mp.                                   | 1,702,124 |
| 18 | schoolchild*.mp.                             | 10,749    |
| 19 | school age*.mp.                              | 18,396    |
| 20 | kid*.mp.                                     | 799,600   |
| 21 | adoles*.mp.                                  | 1,112,806 |
| 22 | teen*.mp.                                    | 28,032    |
| 23 | boy*.mp.                                     | 140,981   |
| 24 | girl*.mp.                                    | 134,061   |
| 25 | minors*.mp.                                  | 2,952     |

| #  | Search String                                                                                                           | Hits      |
|----|-------------------------------------------------------------------------------------------------------------------------|-----------|
| 26 | pubert*.mp.                                                                                                             | 38,571    |
| 27 | paediatric*.mp.                                                                                                         | 73,920    |
| 28 | pediatric*.mp.                                                                                                          | 344,266   |
| 29 | schools.mp.                                                                                                             | 62,016    |
| 30 | primary school*.mp.                                                                                                     | 14,166    |
| 31 | secondary school*.mp.                                                                                                   | 8,162     |
| 32 | elementary school*.mp.                                                                                                  | 7,730     |
| 33 | high school*.mp.                                                                                                        | 30,802    |
| 34 | 14 or 15 or 16 or 17 or 18 or 19 or 20 or 21 or 22 or 23 or 24 or 25<br>or 26 or 27 or 28 or 29 or 30 or 31 or 32 or 33 | 3,210,595 |
| 35 | random*.tw. or placebo*.mp. or double-blind*.tw.                                                                        | 1,193,846 |
| 36 | 3 and 13 and 34 and 35                                                                                                  | 623       |

Note. exp – explode search term; .mp. – multiple field search; .tw. - text word in title or abstract, .pt. - publication type; .adj. – adjacent to; ? – wildcard for 0 or 1 characters; \* - wildcard multiple characters.

Table 5. Clinical Search Terms - MEDLINE

| #  | Search String                              | Hits      |
|----|--------------------------------------------|-----------|
| 1  | schizophrenia.mp.                          | 117,848   |
| 2  | lurasidone.mp.                             | 220       |
| 3  | aripiprazole.mp.                           | 2,913     |
| 4  | asenapine.mp.                              | 270       |
| 5  | clozapine.mp.                              | 10,644    |
| 6  | olanzapine.mp.                             | 7,542     |
| 7  | paliperidone.mp.                           | 801       |
| 8  | risperidone.mp.                            | 8,299     |
| 9  | quetiapine.mp.                             | 3,959     |
| 10 | ziprasidone.mp.                            | 1,721     |
| 11 | 2 or 3 or 4 or 5 or 6 or 7 or 8 or 9 or 10 | 25,099    |
| 12 | juvenile.mp.                               | 68,455    |
| 13 | childhood onset.mp.                        | 3,772     |
| 14 | young adult.mp.                            | 502,135   |
| 15 | child*.mp.                                 | 2,033,496 |
| 16 | schoolchild*.mp.                           | 11,373    |
| 17 | school age*.mp.                            | 16,163    |
| 18 | kid*.mp.                                   | 736,713   |
| 19 | adoles*.mp.                                | 1,756,425 |
| 20 | teen*.mp.                                  | 23,985    |
| 21 | boy*.mp.                                   | 123,533   |
| 22 | girl*.mp.                                  | 118,165   |
| 23 | minors*.mp.                                | 4,789     |
| 24 | pubert*.mp.                                | 36,927    |
| 25 | paediatric*.mp.                            | 46,554    |

---

|    |                                                                                                                         |           |
|----|-------------------------------------------------------------------------------------------------------------------------|-----------|
| 26 | pediatric*.mp.                                                                                                          | 248,016   |
| 27 | schools.mp.                                                                                                             | 109,178   |
| 28 | primary school*.mp.                                                                                                     | 8,835     |
| 29 | secondary school*.mp.                                                                                                   | 7,498     |
| 30 | elementary school*.mp.                                                                                                  | 7,363     |
| 31 | high school*.mp.                                                                                                        | 22,909    |
| 32 | 12 or 13 or 14 or 15 or 16 or 17 or 18 or 19 or 20 or 21 or 22 or 23<br>or 24 or 25 or 26 or 27 or 28 or 29 or 30 or 31 | 3,984,468 |
| 33 | randomized controlled trial.pt.                                                                                         | 410,684   |
| 34 | (random* or double-blind*).tw or placebo*.mp                                                                            | 910,128   |
| 35 | 33 or 34                                                                                                                | 995,219   |
| 36 | 1 and 11 and 32 and 35                                                                                                  | 692       |

---

Note. exp – explode search term; .mp. – multiple field search; .tw. - text word in title or abstract, .pt. - publication type; .adj. – adjacent to; ? – wildcard for 0 or 1 characters; \* - wildcard multiple characters.

Table 6. Clinical Search Terms - Cochrane Library

| #  | Search String                                      | Hits   |
|----|----------------------------------------------------|--------|
| 1  | schizophrenia.mp.                                  | 402    |
| 2  | lurasidone.mp.                                     | 2      |
| 3  | aripiprazole.mp.                                   | 56     |
| 4  | asenapine.mp.                                      | 8      |
| 5  | clozapine.mp.                                      | 88     |
| 6  | olanzapine.mp.                                     | 127    |
| 7  | paliperidone.mp.                                   | 12     |
| 8  | risperidone.mp.                                    | 139    |
| 9  | quetiapine.mp.                                     | 84     |
| 10 | ziprasidone.mp.                                    | 45     |
| 11 | 2 or 3 or 4 or 5 or 6 or 7 or 8 or 9 or 10         | 227    |
| 12 | randomi?ed control* trial*.tw.                     | 15,107 |
| 13 | clinical trial*.mp.                                | 4,041  |
| 14 | random*.mp.                                        | 17,428 |
| 15 | (doubl* adj blind*).mp.                            | 2,266  |
| 16 | placebo*.tw. or placebo.mp.                        | 4,128  |
| 17 | (singl* adj blind*).mp.                            | 295    |
| 18 | assign*.mp.                                        | 36,632 |
| 19 | allocate*.mp.                                      | 371    |
| 20 | rct.tw.                                            | 2,887  |
| 21 | 12 or 13 or 14 or 15 or 16 or 17 or 18 or 19 or 20 | 36,632 |
| 22 | juvenile.mp.                                       | 63     |
| 23 | childhood onset.mp.                                | 5      |
| 24 | young adult.mp.                                    | 630    |
| 25 | child*.mp.                                         | 3,834  |

---

|    |                                                                                                                         |       |
|----|-------------------------------------------------------------------------------------------------------------------------|-------|
| 26 | schoolchild*.mp.                                                                                                        | 17    |
| 27 | school age*.mp.                                                                                                         | 89    |
| 28 | kid*.mp.                                                                                                                | 906   |
| 29 | adoles*.mp.                                                                                                             | 2,218 |
| 30 | teen*.mp.                                                                                                               | 56    |
| 31 | boy*.mp.                                                                                                                | 96    |
| 32 | girl*.mp.                                                                                                               | 96    |
| 33 | minors*.mp.                                                                                                             | 18    |
| 34 | pubert*.mp.                                                                                                             | 15    |
| 35 | paediatric*.mp.                                                                                                         | 558   |
| 36 | pediatric*.mp.                                                                                                          | 343   |
| 37 | schools.mp.                                                                                                             | 268   |
| 38 | primary school*.mp.                                                                                                     | 32    |
| 39 | secondary school*.mp.                                                                                                   | 28    |
| 40 | elementary school*.mp.                                                                                                  | 17    |
| 41 | high school*.mp.                                                                                                        | 44    |
| 42 | 22 or 23 or 24 or 25 or 26 or 27 or 28 or 29 or 30 or 31 or 32 or 33<br>or 34 or 35 or 36 or 37 or 38 or 39 or 40 or 41 | 5,982 |
| 43 | 1 and 11 and 21 and 42                                                                                                  | 22    |

---

Note. exp – explode search term; .mp. – multiple field search; .tw. - text word in title or abstract, .pt. - publication type; .adj. – adjacent to; ? – wildcard for 0 or 1 characters; \* - wildcard multiple characters.

Table 7. List of Excluded Studies and Reasons for Exclusion

| #  | Author and year             | Reason for exclusion                                                                         | Reference |
|----|-----------------------------|----------------------------------------------------------------------------------------------|-----------|
| 1  | Findling et al., 2010       | Conference abstract. Full paper included in review.                                          | [3]       |
| 2  | Robinson et al., 2015       | Incorrect population. 15-40 year olds with no subgroup results.                              | [4]       |
| 3  | Kemp et al., 2013           | Post-hoc analysis of a full paper included in review.                                        | [5]       |
| 4  | Huffman, 1997               | Incorrect comparator. First generation antipsychotic.                                        | [6]       |
| 5  | Kumra, 2010                 | Limited outcome data as only abstract was available.                                         | [7]       |
| 6  | McCormack, 2010             | Full text review revealed this to be a review.                                               | [8]       |
| 7  | Whitehead et al., 2009      | Post-hoc analysis of a full paper included in review.                                        | [9]       |
| 8  | Mathew et al., 2009         | Post-hoc analysis of a full paper included in review.                                        | [10]      |
| 9  | Kryzhanovskaya et al., 2009 | Incorrect population. Pooled analysis of schizophrenia and bipolar trials.                   | [11]      |
| 10 | Correll, 2010               | Irrelevant outcomes. Examined impact of early response.                                      | [12]      |
| 11 | Gallego et al., 2011        | Incorrect population. 16-40 year olds with no subgroup results.                              | [13]      |
| 12 | Correll et al., 2010        | Irrelevant outcomes reported.                                                                | [14]      |
| 13 | Correll et al., 2014        | No study duration in trial protocol. Patients were all discontinued after 37 relapse events. | [15]      |

Figure 1. Network of Evidence

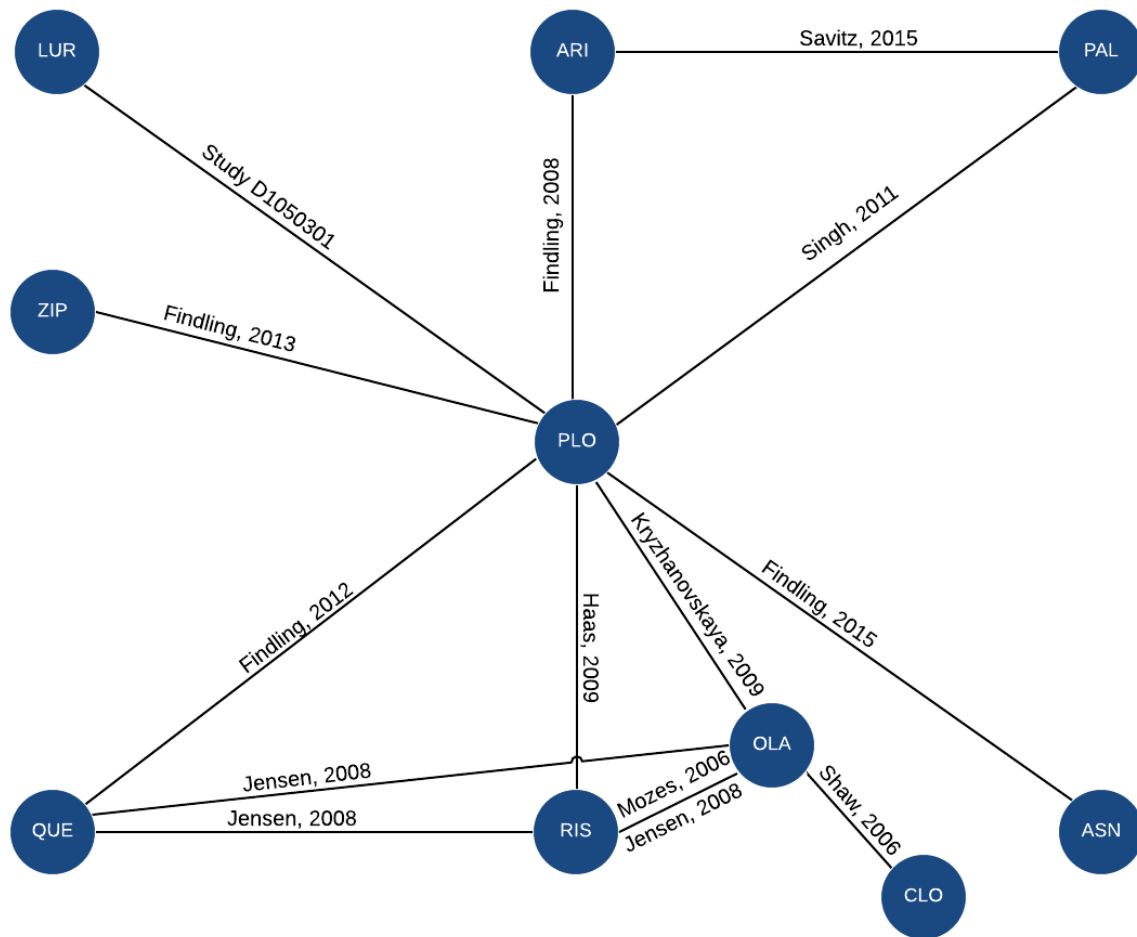

Abbreviations: ARI aripiprazole; ASN asenapine; CLO clozapine; LUR lurasidone; OLA olanzapine; PAL paliperidone extended-release; PLO placebo; QUE quetiapine; RIS risperidone; ZIP ziprasidone
