# Supplementary material for: Lurasidone compared to other atypical antipsychotic monotherapies for adolescent schizophrenia: a systematic literature review and network meta-analysis
Source: PubMed Central journal article supplement (PMC7497364; doi:10.1007/s00787-019-01425-2), 2019-11-22
Supplement: 787_2019_1425_MOESM2_ESM.pdf [file 787_2019_1425_MOESM2_ESM.pdf]

## Appendix 2. Network Meta-Analysis of Additional Outcome Variables

**Fig 1.** Forest Plot of Response Rates: Lurasidone Versus Comparators

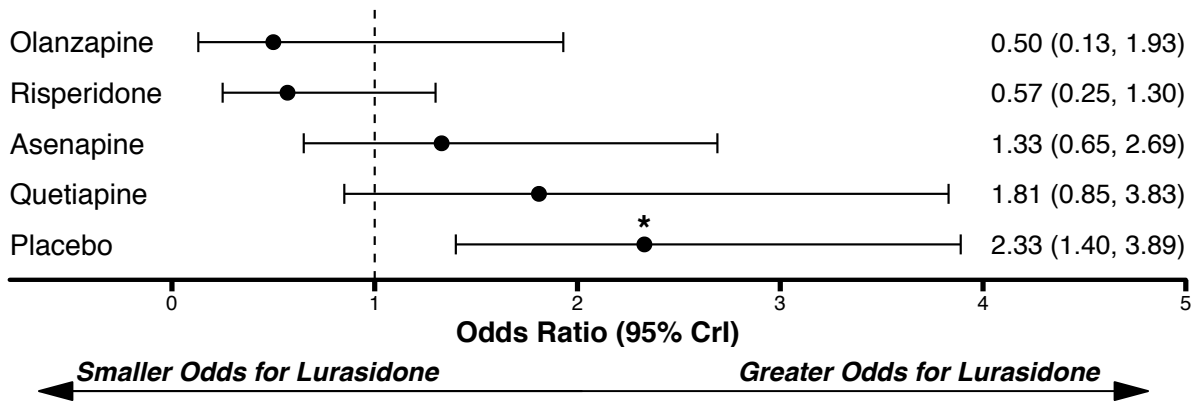

\* Statistically significant compared to lurasidone

Dashed line at 1 represents no difference from lurasidone.

Response was defined as a  $\geq 20\%$  improvement in PANSS total score with 3 exceptions: Mozes 2006 and Findling 2012 reported it as  $\geq 30\%$  improvement in PANSS total score and Jensen 2008 reported it as  $\geq 40\%$  improvement in PANSS total score.

**Fig 2.** Forest Plot of Somnolence: Lurasidone vs. Comparators

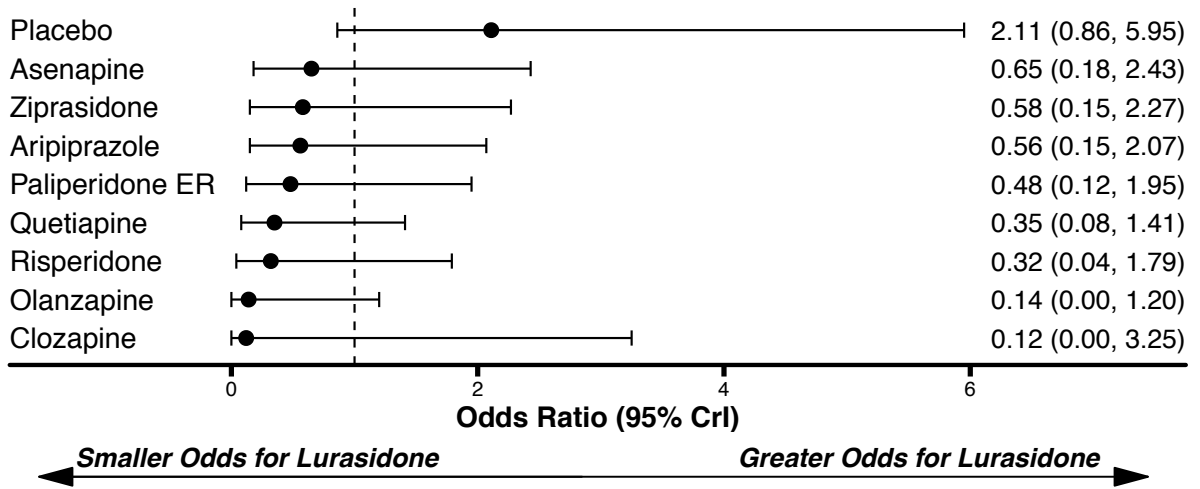

\* Statistically significant compared to lurasidone

Dashed line at 1 represents no difference from lurasidone.

**Fig 3.** Forest Plot of Sedation: Lurasidone versus Comparators

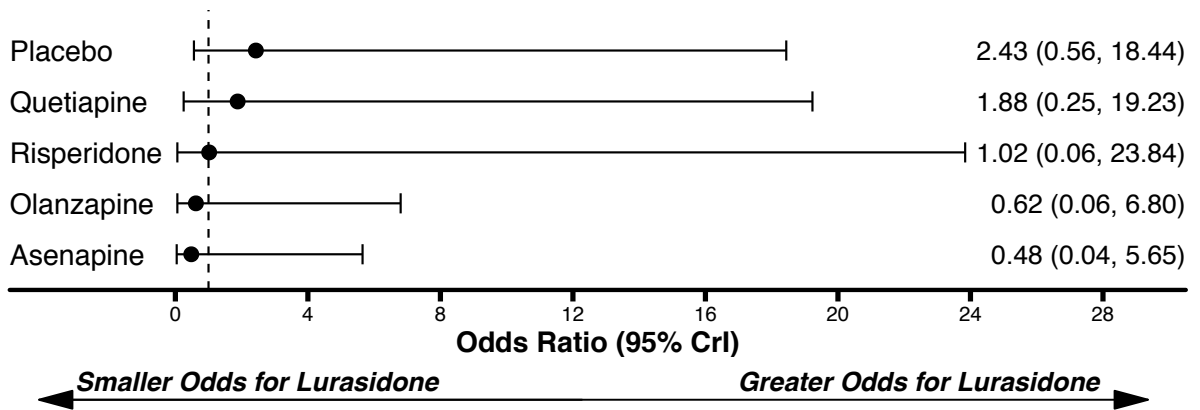

\* Statistically significant compared to lurasidone

Dashed line at 1 represents no difference from lurasidone.

**Fig 4.** Forest Plot of Change from Baseline in Serum Glucose: Lurasidone vs. Comparators

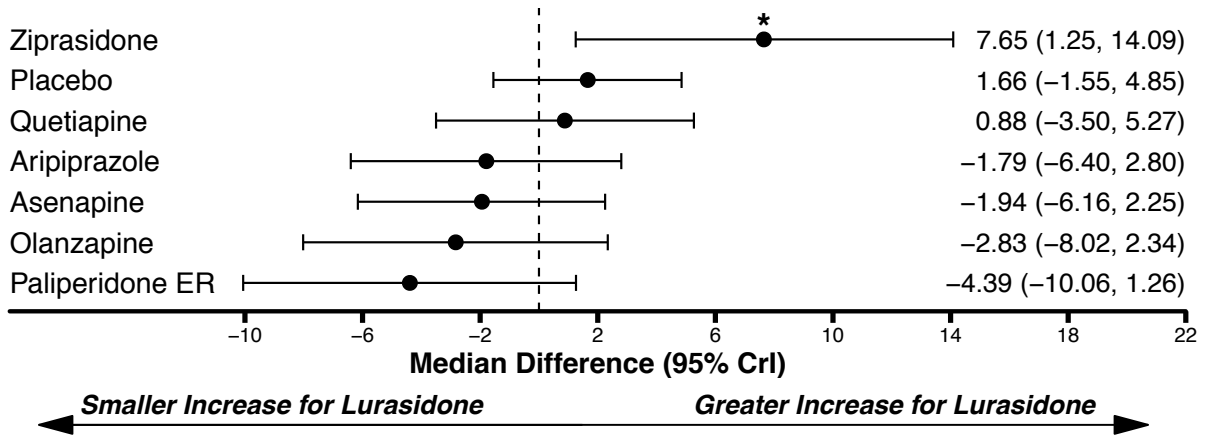

\* Statistically significant compared to lurasidone

Dashed line at 0 represents no difference from lurasidone.

**Fig 5.** Forest Plot of Change from Baseline in Total Cholesterol: Lurasidone vs. Comparators

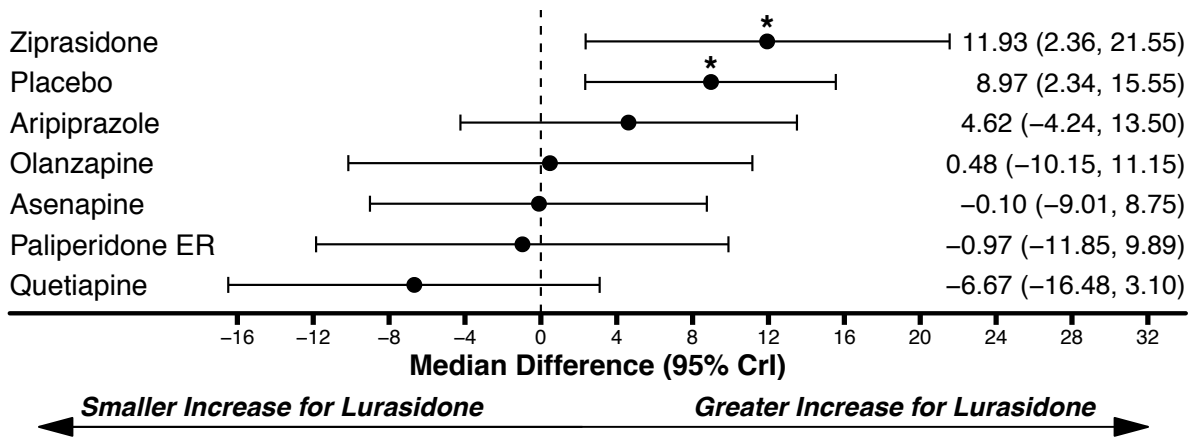

\* Statistically significant compared to lurasidone

Dashed line at 0 represents no difference from lurasidone.

**Fig 6.** Forest Plot of Change from Baseline in Serum Triglycerides: Lurasidone vs. Comparators

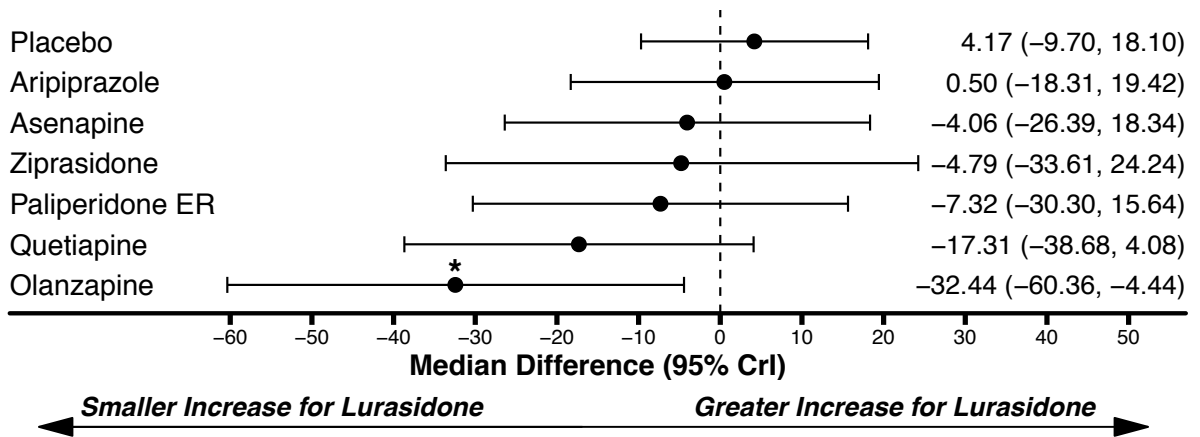

\* Statistically significant compared to lurasidone

Dashed line at 0 represents no difference from lurasidone.

**Fig 7.** Forest Plot of Discontinuation Due to Adverse Events: Lurasidone vs. Comparators

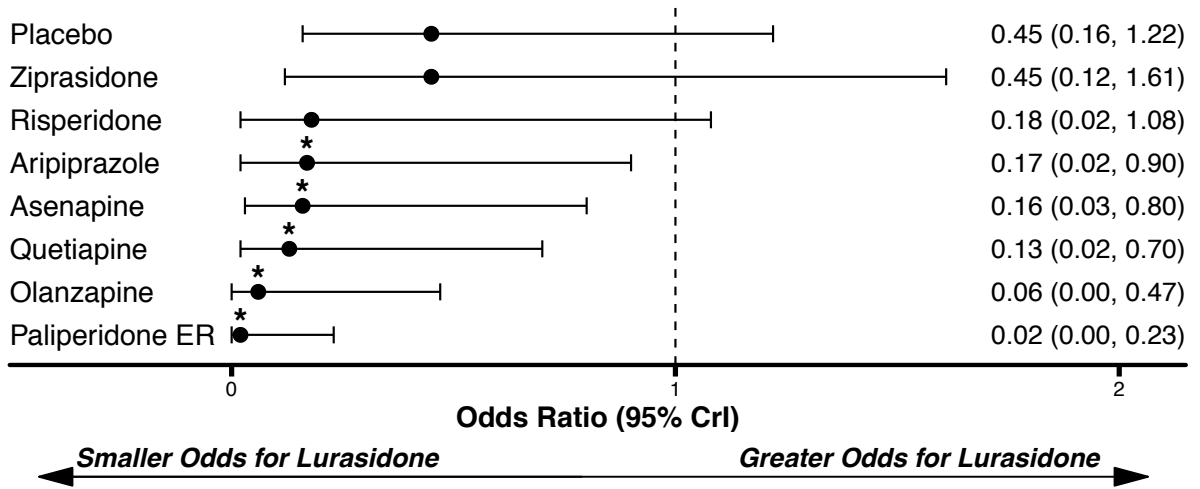

\* Statistically significant compared to lurasidone

Dashed line at 1 represents no difference from lurasidone.
