# Supplementary material for: Lurasidone compared to other atypical antipsychotic monotherapies for adolescent schizophrenia: a systematic literature review and network meta-analysis
Source: PubMed Central journal article supplement (PMC7497364; doi:10.1007/s00787-019-01425-2), 2019-11-22
Supplement: 787_2019_1425_MOESM3_ESM.pdf [file 787_2019_1425_MOESM3_ESM.pdf]

### Appendix 3. Comparisons with Placebo

**Fig 1.** Forest Plot of Change from Baseline in PANSS Total Score Compared to Placebo

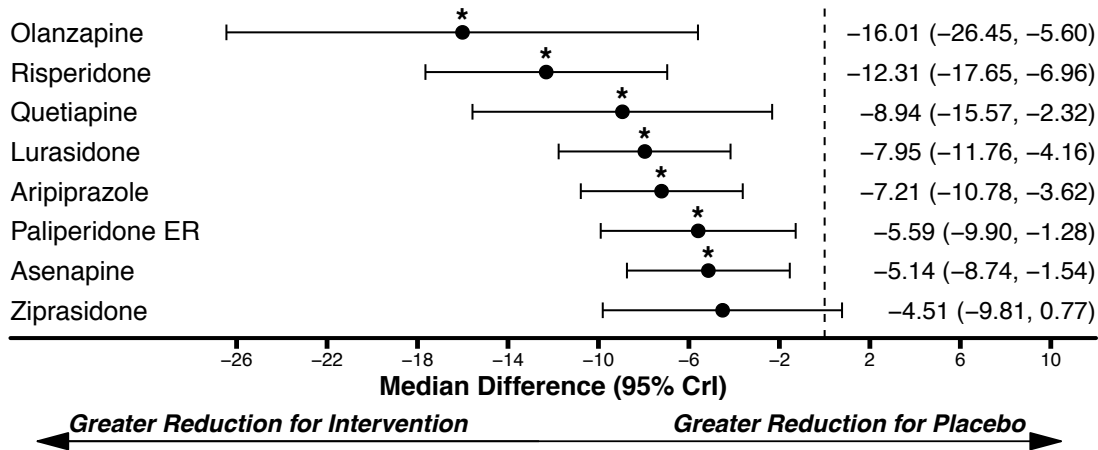

\* Statistically significant compared to placebo

Dashed line at 0 represents no difference from placebo.

**Fig 2.** Forest Plot of Change from Baseline in CGI-S Score Compared to Placebo

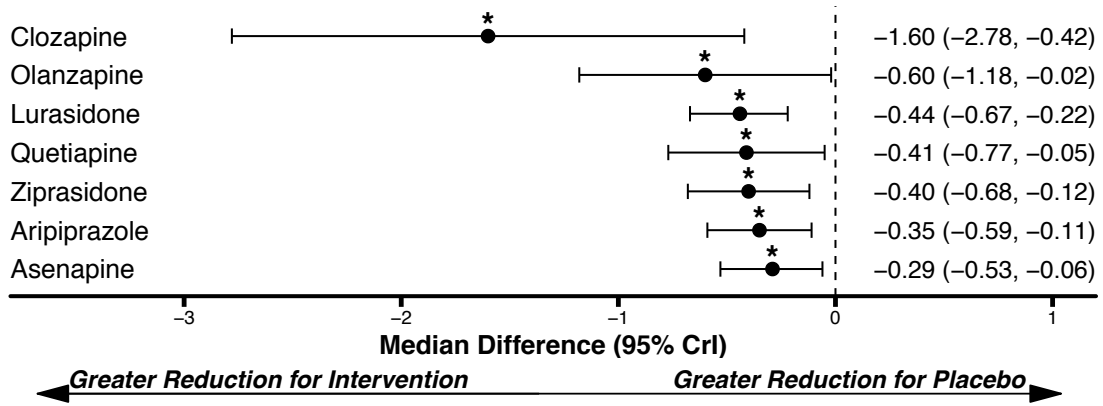

\* Statistically significant compared to placebo

Dashed line at 0 represents no difference from placebo.

**Fig 3.** Forest Plot of Response Rates Compared to Placebo

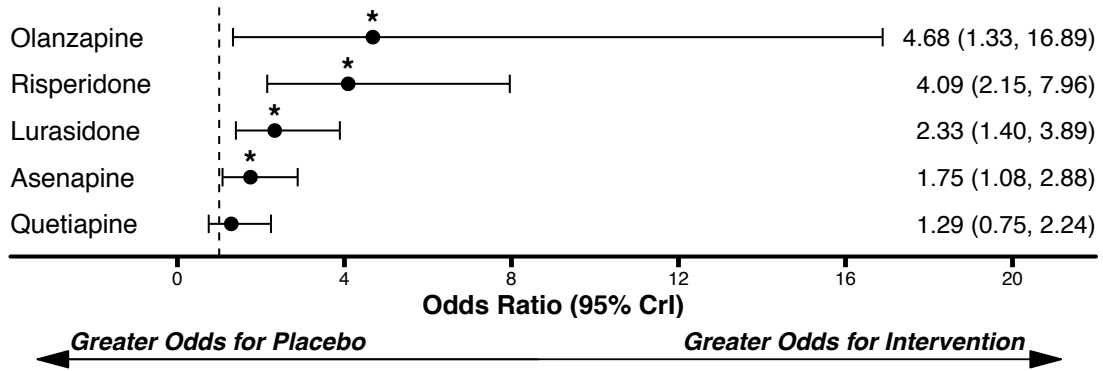

\* Statistically significant compared to placebo

Dashed line at 1 represents no difference from placebo.

Response was defined as a  $\geq 20\%$  improvement in PANSS total score with 3 exceptions: Mozes 2006 and Findling 2012 reported it as  $\geq 30\%$  improvement in PANSS total score and Jensen 2008 reported it as  $\geq 40\%$  improvement in PANSS total score.

**Fig 4.** Forest Plot of Change from Baseline in Body Weight Compared to Placebo

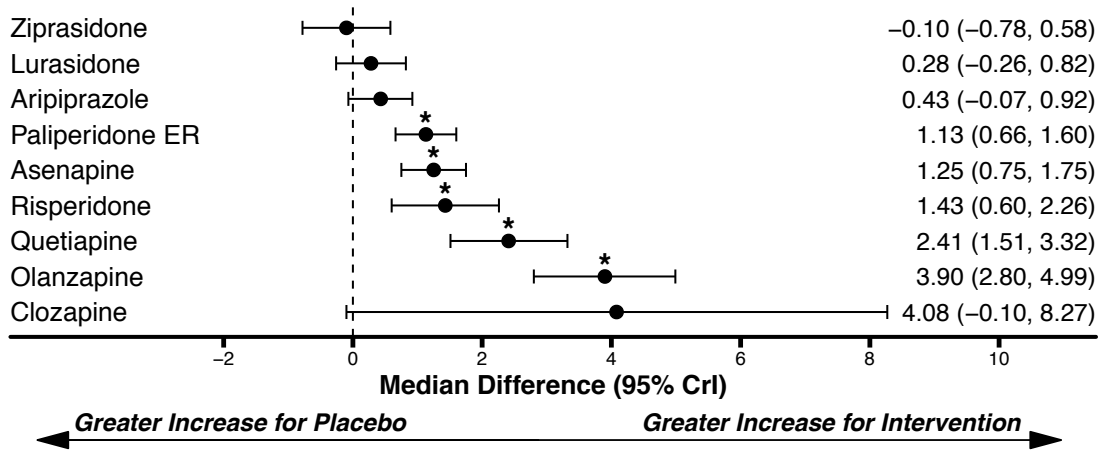

\* Statistically significant compared to placebo

Dashed line at 0 represents no difference from placebo.

**Fig 5.** Forest Plot of Change from Baseline in Serum Glucose Compared to Placebo

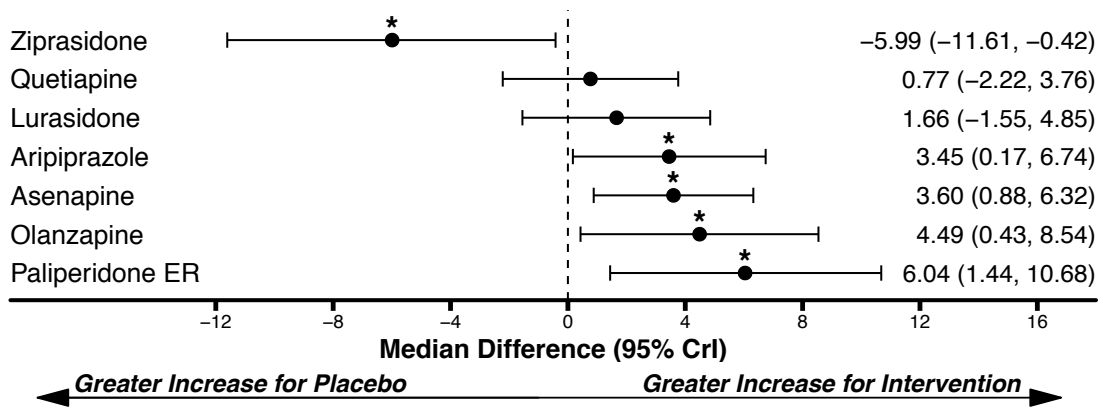

\* Statistically significant compared to placebo

Dashed line at 0 represents no difference from placebo.

**Fig 6.** Forest Plot of Change from Baseline in Total Cholesterol Compared to Placebo

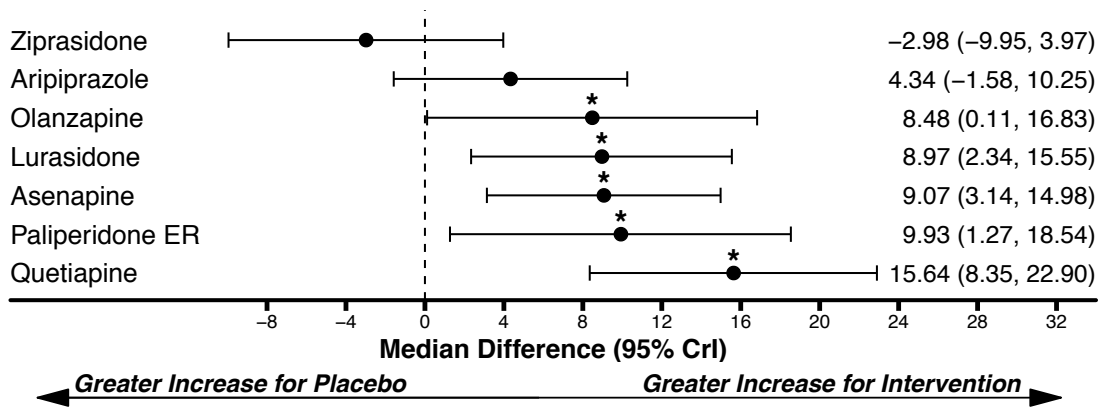

\* Statistically significant compared to placebo

Dashed line at 0 represents no difference from placebo.

**Fig 7. Forest Plot of Change from Baseline in Triglycerides Compared to Placebo**

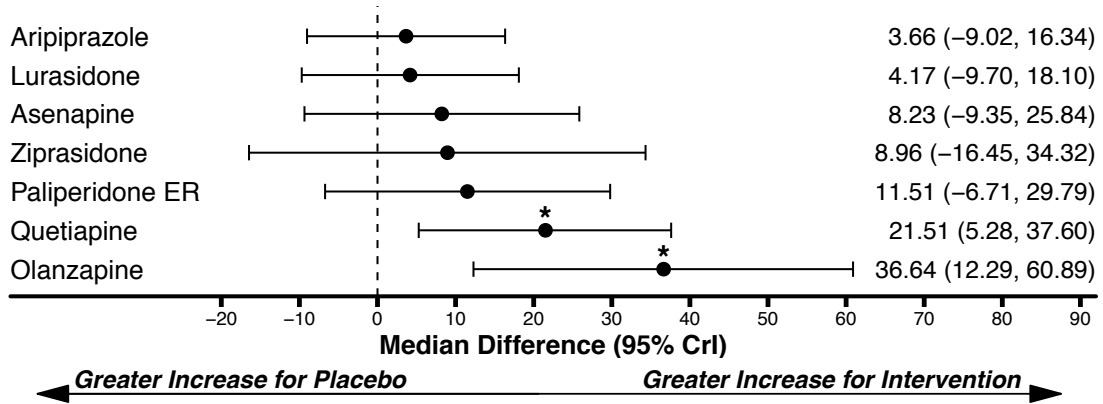

\* Statistically significant compared to placebo

Dashed line at 0 represents no difference from placebo.

**Fig 8.** Forest Plot of All-Cause Discontinuation Compared to Placebo

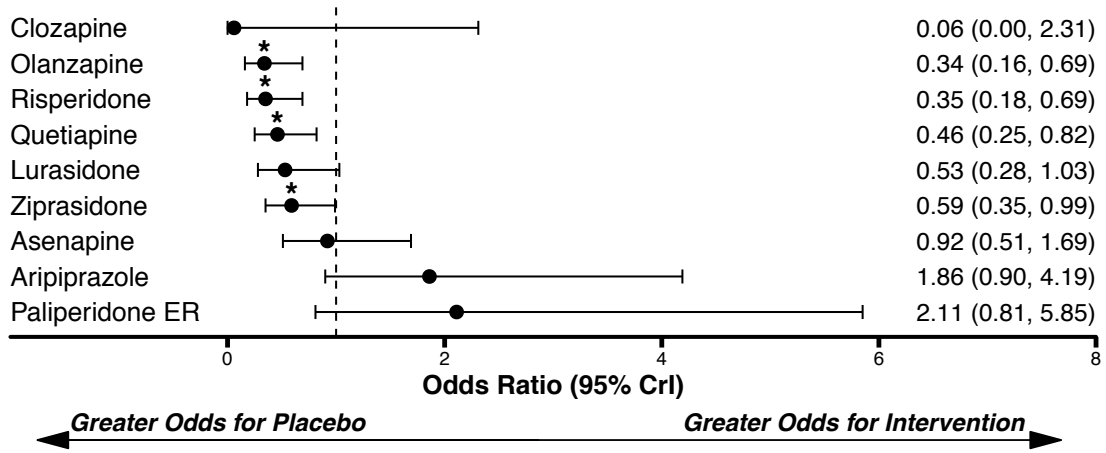

\* Statistically significant compared to placebo

Dashed line at 1 represents no difference from placebo.



**Fig 9.** Forest Plot of Discontinuation Due to Adverse Events Compared to Placebo

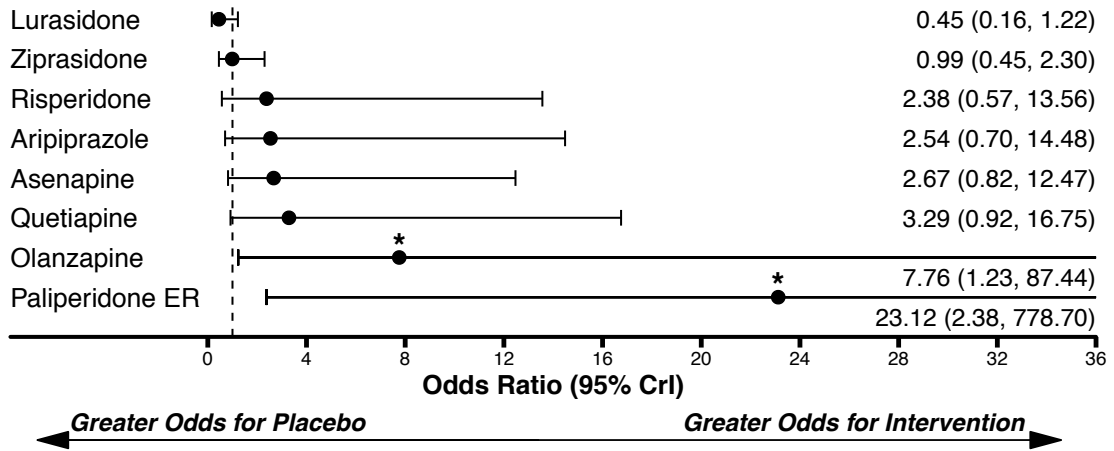

\* Statistically significant compared to placebo

Dashed line at 1 represents no difference from placebo.

**Fig 10.** Forest Plot of Extrapyramidal Symptoms Compared to Placebo

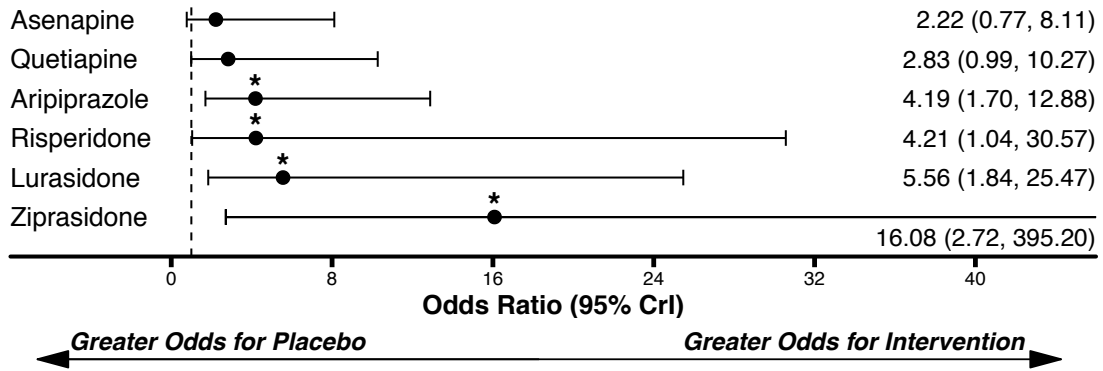

\* Statistically significant compared to placebo

Dashed line at 1 represents no difference from placebo.

**Fig 11.** Forest Plot of Akathisia Compared to Placebo

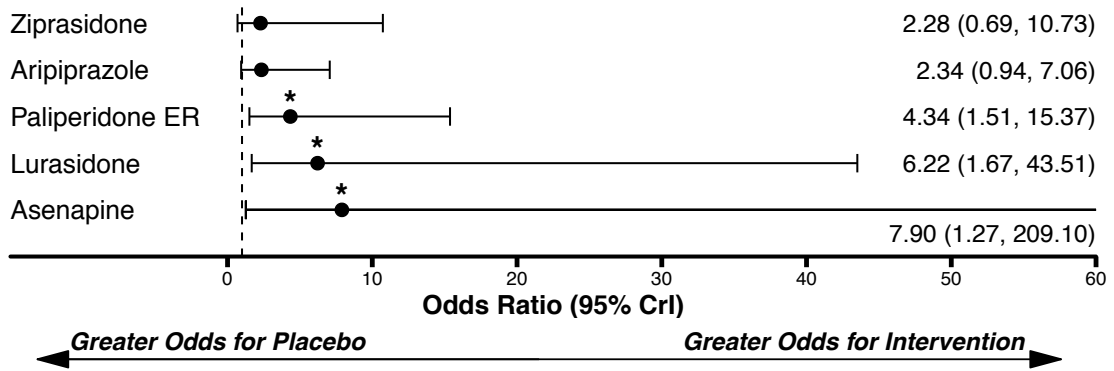

\* Statistically significant compared to placebo

Dashed line at 1 represents no difference from placebo.

**Fig 12.** Forest Plot of Somnolence Compared to Placebo

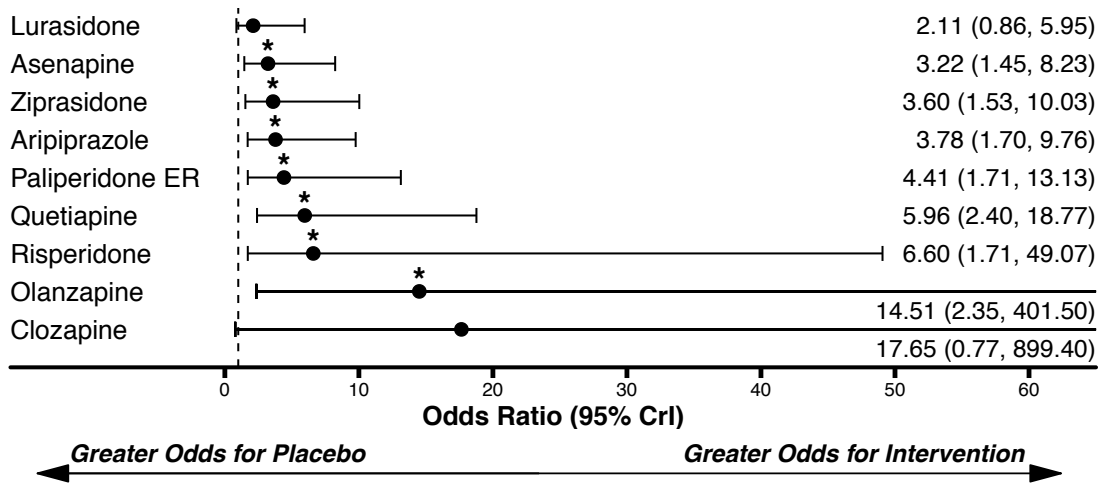

\* Statistically significant compared to placebo

Dashed line at 1 represents no difference from placebo.

**Fig 13.** Forest Plot of Sedation Compared to Placebo

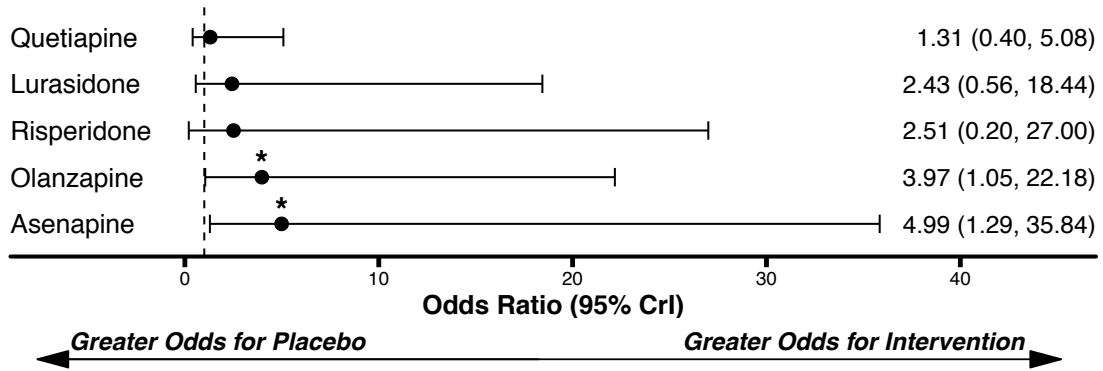

\* Statistically significant compared to placebo

Dashed line at 1 represents no difference from placebo.
