# Supplementary material for: Lurasidone compared to other atypical antipsychotic monotherapies for adolescent schizophrenia: a systematic literature review and network meta-analysis
Source: PubMed Central journal article supplement (PMC7497364; doi:10.1007/s00787-019-01425-2), 2019-11-22
Supplement: 787_2019_1425_MOESM5_ESM.pdf [file 787_2019_1425_MOESM5_ESM.pdf]

## Appendix 5. Random Effects Models

The random effects model results are included to document the differences from the fixed effects models reported in the main paper. The conclusions from the fixed effects and random effects models were consistent on change from baseline in PANSS total score, change from baseline in CGI-S score, extrapyramidal symptoms, akathisia, response, sedation, somnolence, change from baseline in total cholesterol, and change from baseline in triglycerides. While the estimates were similar, conclusions changed on some comparisons for change from baseline in weight (Table 3), all cause discontinuation (Table 4), discontinuation due to adverse events (Table 7), and serum glucose (Table 11). In each instance, comparisons between lurasidone and other antipsychotics went from being marginally significant to marginally non-significant. Results of the fixed effect models were reported as the primary results because they generally fit the data better based on the deviance information criterion (DIC), a deviance-based measure that penalizes models for complexity.

Table 1. Change from Baseline – PANSS Total Score

| <b>Comparison</b>           | <b>Median Change</b> | <b>95% CrI Lower</b> | <b>95% CrI Upper</b> |
|-----------------------------|----------------------|----------------------|----------------------|
| Aripiprazole vs. Placebo    | -7.09                | -11.01               | -3.11                |
| Asenapine vs. Placebo       | -5.20                | -9.23                | -1.08                |
| Lurasidone vs. Placebo      | -7.94                | -12.24               | -3.74                |
| Olanzapine vs. Placebo      | -15.93               | -26.08               | -5.41                |
| Paliperidone vs. Placebo    | -5.55                | -10.13               | -0.91                |
| Quetiapine vs. Placebo      | -9.01                | -15.97               | -1.73                |
| Risperidone vs. Placebo     | -12.25               | -17.95               | -6.68                |
| Ziprasidone vs. Placebo     | -4.49                | -10.21               | 1.14                 |
| Lurasidone vs. Aripiprazole | -0.84                | -6.68                | 4.88                 |
| Lurasidone vs. Asenapine    | -2.77                | -8.68                | 3.06                 |
| Lurasidone vs. Olanzapine   | 7.97                 | -3.19                | 19.17                |
| Lurasidone vs. Paliperidone | -2.38                | -8.66                | 3.83                 |
| Lurasidone vs. Quetiapine   | 1.06                 | -7.32                | 9.21                 |
| Lurasidone vs. Risperidone  | 4.28                 | -2.71                | 11.41                |
| Lurasidone vs. Ziprasidone  | -3.45                | -10.56               | 3.66                 |

Note. No differences in conclusions from the fixed effects base case analysis.

Table 2. Change from Baseline – CGI-S Score

| <b>Comparison</b>           | <b>Median Change</b> | <b>95% CrI Lower</b> | <b>95% CrI Upper</b> |
|-----------------------------|----------------------|----------------------|----------------------|
| Aripiprazole vs. Placebo    | -0.35                | -0.74                | 0.04                 |
| Asenapine vs. Placebo       | -0.29                | -0.69                | 0.10                 |
| Clozapine vs. Placebo       | -1.60                | -2.90                | -0.33                |
| Lurasidone vs. Placebo      | -0.44                | -0.84                | -0.06                |
| Olanzapine vs. Placebo      | -0.60                | -1.30                | 0.10                 |
| Quetiapine vs. Placebo      | -0.41                | -0.89                | 0.07                 |
| Ziprasidone vs. Placebo     | -0.40                | -0.85                | 0.07                 |
| Lurasidone vs. Aripiprazole | -0.09                | -0.65                | 0.46                 |
| Lurasidone vs. Asenapine    | -0.15                | -0.70                | 0.40                 |
| Lurasidone vs. Clozapine    | 1.16                 | -0.18                | 2.50                 |
| Lurasidone vs. Olanzapine   | 0.16                 | -0.63                | 0.93                 |
| Lurasidone vs. Quetiapine   | -0.03                | -0.64                | 0.57                 |
| Lurasidone vs. Ziprasidone  | -0.04                | -0.65                | 0.55                 |

Note. No differences in conclusions from the fixed effects base case analysis.

Table 3. Change from Baseline – Weight

| Comparison                         | Median Change | 95% CrI Lower | 95% CrI Upper |
|------------------------------------|---------------|---------------|---------------|
| Aripiprazole vs. Placebo           | 0.48          | -0.47         | 1.46          |
| Asenapine vs. Placebo              | 1.21          | 0.32          | 2.17          |
| Clozapine vs. Placebo              | 4.06          | -0.42         | 8.54          |
| Lurasidone vs. Placebo             | 0.28          | -0.86         | 1.42          |
| Olanzapine vs. Placebo             | 3.83          | 2.38          | 5.24          |
| Paliperidone vs. Placebo           | 1.25          | 0.12          | 2.35          |
| Quetiapine vs. Placebo             | 2.41          | 1.06          | 3.74          |
| Risperidone vs. Placebo            | 1.50          | 0.33          | 2.75          |
| Ziprasidone vs. Placebo            | -0.10         | -1.44         | 1.23          |
| Lurasidone vs. Aripiprazole        | -0.20         | -1.70         | 1.27          |
| <b>Lurasidone vs. Asenapine</b>    | <b>-0.94</b>  | <b>-2.43</b>  | <b>0.50</b>   |
| Lurasidone vs. Clozapine           | -3.77         | -8.41         | 0.83          |
| Lurasidone vs. Olanzapine          | -3.56         | -5.33         | -1.69         |
| <b>Lurasidone vs. Paliperidone</b> | <b>-0.97</b>  | <b>-2.56</b>  | <b>0.62</b>   |
| Lurasidone vs. Quetiapine          | -2.12         | -3.87         | -0.36         |
| <b>Lurasidone vs. Risperidone</b>  | <b>-1.22</b>  | <b>-2.92</b>  | <b>0.41</b>   |
| Lurasidone vs. Ziprasidone         | 0.38          | -1.37         | 2.14          |

Note. Three differences in conclusions from the fixed effects base case analysis: lurasidone vs. asenapine, lurasidone vs. risperidone, and lurasidone vs. paliperidone went from being marginally significant to marginally insignificant.

Table 4. All Cause Discontinuation

| Comparison                         | Median Change | 95% CrI Lower | 95% CrI Upper |
|------------------------------------|---------------|---------------|---------------|
| Aripiprazole vs. Placebo           | 1.88          | 0.75          | 4.93          |
| Asenapine vs. Placebo              | 0.91          | 0.41          | 2.08          |
| Clozapine vs. Placebo              | 0.07          | 0.00          | 2.98          |
| Lurasidone vs. Placebo             | 0.53          | 0.22          | 1.24          |
| Olanzapine vs. Placebo             | 0.34          | 0.14          | 0.80          |
| Paliperidone vs. Placebo           | 2.11          | 0.58          | 7.73          |
| Quetiapine vs. Placebo             | 0.46          | 0.22          | 1.00          |
| Risperidone vs. Placebo            | 0.35          | 0.15          | 0.77          |
| Ziprasidone vs. Placebo            | 0.59          | 0.26          | 1.36          |
| <b>Lurasidone vs. Aripiprazole</b> | <b>0.28</b>   | <b>0.08</b>   | <b>1.00</b>   |
| Lurasidone vs. Asenapine           | 0.58          | 0.18          | 1.89          |
| Lurasidone vs. Clozapine           | 7.99          | 0.16          | 2428.00       |
| Lurasidone vs. Olanzapine          | 1.58          | 0.47          | 5.45          |
| <b>Lurasidone vs. Paliperidone</b> | <b>0.25</b>   | <b>0.05</b>   | <b>1.18</b>   |
| Lurasidone vs. Quetiapine          | 1.16          | 0.36          | 3.57          |
| Lurasidone vs. Risperidone         | 1.55          | 0.47          | 5.16          |
| Lurasidone vs. Ziprasidone         | 0.90          | 0.27          | 2.94          |

Note. Two differences in conclusions from the fixed effects base case analysis: lurasidone vs. aripiprazole and lurasidone vs. paliperidone went from being marginally significant to marginally insignificant.

Table 5. Extrapyramidal Symptoms

| <b>Comparison</b>           | <b>Median Change</b> | <b>95% CrI Lower</b> | <b>95% CrI Upper</b> |
|-----------------------------|----------------------|----------------------|----------------------|
| Aripiprazole vs. Placebo    | 4.25                 | 1.00                 | 19.24                |
| Asenapine vs. Placebo       | 2.17                 | 0.48                 | 11.75                |
| Lurasidone vs. Placebo      | 5.68                 | 1.20                 | 37.04                |
| Quetiapine vs. Placebo      | 2.81                 | 0.62                 | 15.23                |
| Risperidone vs. Placebo     | 4.26                 | 0.71                 | 38.93                |
| Ziprasidone vs. Placebo     | 16.73                | 1.89                 | 518.40               |
| Lurasidone vs. Aripiprazole | 1.33                 | 0.16                 | 14.31                |
| Lurasidone vs. Asenapine    | 2.61                 | 0.26                 | 28.51                |
| Lurasidone vs. Quetiapine   | 2.04                 | 0.21                 | 21.09                |
| Lurasidone vs. Risperidone  | 1.34                 | 0.09                 | 17.31                |
| Lurasidone vs. Ziprasidone  | 0.33                 | 0.01                 | 5.95                 |

Note. No differences in conclusions from the fixed effects base case analysis.

Table 6. Akathisia

| <b>Comparison</b>           | <b>Median Change</b> | <b>95% CrI Lower</b> | <b>95% CrI Upper</b> |
|-----------------------------|----------------------|----------------------|----------------------|
| Aripiprazole vs. Placebo    | 2.44                 | 0.51                 | 13.85                |
| Asenapine vs. Placebo       | 7.86                 | 0.70                 | 308.90               |
| Lurasidone vs. Placebo      | 6.39                 | 0.81                 | 75.22                |
| Paliperidone vs. Placebo    | 5.19                 | 1.00                 | 48.65                |
| Ziprasidone vs. Placebo     | 2.31                 | 0.27                 | 23.93                |
| Lurasidone vs. Aripiprazole | 2.63                 | 0.17                 | 47.07                |
| Lurasidone vs. Asenapine    | 0.80                 | 0.01                 | 26.25                |
| Lurasidone vs. Paliperidone | 1.23                 | 0.06                 | 22.64                |
| Lurasidone vs. Ziprasidone  | 2.82                 | 0.12                 | 68.72                |

Note. No differences in conclusions from the fixed effects base case analysis.

Table 7. Discontinuation Due to Adverse Events

| <b>Comparison</b>                  | <b>Median Change</b> | <b>95% CrI Lower</b> | <b>95% CrI Upper</b> |
|------------------------------------|----------------------|----------------------|----------------------|
| Aripiprazole vs. Placebo           | 2.48                 | 0.56                 | 14.91                |
| Asenapine vs. Placebo              | 2.66                 | 0.66                 | 14.43                |
| Lurasidone vs. Placebo             | 0.44                 | 0.13                 | 1.49                 |
| Olanzapine vs. Placebo             | 7.76                 | 1.14                 | 91.41                |
| Paliperidone vs. Placebo           | 21.22                | 1.99                 | 682.70               |
| Quetiapine vs. Placebo             | 3.33                 | 0.79                 | 19.18                |
| Risperidone vs. Placebo            | 2.40                 | 0.51                 | 15.06                |
| Ziprasidone vs. Placebo            | 1.00                 | 0.33                 | 3.20                 |
| <b>Lurasidone vs. Aripiprazole</b> | <b>0.17</b>          | <b>0.02</b>          | <b>1.23</b>          |
| <b>Lurasidone vs. Asenapine</b>    | <b>0.16</b>          | <b>0.02</b>          | <b>1.05</b>          |
| Lurasidone vs. Olanzapine          | 0.05                 | 0.00                 | 0.55                 |
| Lurasidone vs. Paliperidone        | 0.02                 | 0.00                 | 0.30                 |
| Lurasidone vs. Quetiapine          | 0.13                 | 0.02                 | 0.88                 |
| Lurasidone vs. Risperidone         | 0.18                 | 0.02                 | 1.30                 |
| Lurasidone vs. Ziprasidone         | 0.44                 | 0.08                 | 2.30                 |

Note. Two differences in conclusions from the fixed effects base case analysis: lurasidone vs. asenapine and lurasidone vs. aripiprazole went from being marginally significant to marginally insignificant.



Table 8. Response

| <b>Comparison</b>          | <b>Median Change</b> | <b>95% CrI Lower</b> | <b>95% CrI Upper</b> |
|----------------------------|----------------------|----------------------|----------------------|
| Asenapine vs. Placebo      | 1.75                 | 0.79                 | 3.91                 |
| Lurasidone vs. Placebo     | 2.34                 | 1.04                 | 5.23                 |
| Olanzapine vs. Placebo     | 4.69                 | 1.14                 | 20.42                |
| Quetiapine vs. Placebo     | 1.28                 | 0.57                 | 2.77                 |
| Risperidone vs. Placebo    | 4.10                 | 1.79                 | 9.84                 |
| Lurasidone vs. Asenapine   | 1.33                 | 0.43                 | 4.17                 |
| Lurasidone vs. Olanzapine  | 0.50                 | 0.09                 | 2.51                 |
| Lurasidone vs. Quetiapine  | 1.82                 | 0.61                 | 5.78                 |
| Lurasidone vs. Risperidone | 0.57                 | 0.17                 | 1.78                 |

Note. No differences in conclusions from the fixed effects base case analysis.

Table 9. Sedation

| <b>Comparison</b>          | <b>Median Change</b> | <b>95% CrI Lower</b> | <b>95% CrI Upper</b> |
|----------------------------|----------------------|----------------------|----------------------|
| Asenapine vs. Placebo      | 4.71                 | 0.32                 | 87.22                |
| Lurasidone vs. Placebo     | 2.37                 | 0.15                 | 41.38                |
| Olanzapine vs. Placebo     | 4.15                 | 0.38                 | 61.62                |
| Quetiapine vs. Placebo     | 1.27                 | 0.12                 | 12.21                |
| Risperidone vs. Placebo    | 2.60                 | 0.07                 | 106.60               |
| Lurasidone vs. Asenapine   | 0.50                 | 0.01                 | 24.78                |
| Lurasidone vs. Olanzapine  | 0.57                 | 0.01                 | 22.46                |
| Lurasidone vs. Quetiapine  | 1.89                 | 0.05                 | 71.74                |
| Lurasidone vs. Risperidone | 0.94                 | 0.01                 | 87.05                |

Note. No differences in conclusions from the fixed effects base case analysis.

Table 10. Somnolence

| <b>Comparison</b>           | <b>Median Change</b> | <b>95% CrI Lower</b> | <b>95% CrI Upper</b> |
|-----------------------------|----------------------|----------------------|----------------------|
| Aripiprazole vs. Placebo    | 3.88                 | 1.19                 | 14.39                |
| Asenapine vs. Placebo       | 3.26                 | 0.87                 | 13.01                |
| Clozapine vs. Placebo       | 17.81                | 0.51                 | 1435.00              |
| Lurasidone vs. Placebo      | 2.09                 | 0.53                 | 9.22                 |
| Olanzapine vs. Placebo      | 15.00                | 1.75                 | 556.80               |
| Paliperidone vs. Placebo    | 4.86                 | 1.31                 | 23.36                |
| Quetiapine vs. Placebo      | 5.98                 | 1.50                 | 27.44                |
| Risperidone vs. Placebo     | 6.61                 | 1.16                 | 60.87                |
| Ziprasidone vs. Placebo     | 3.58                 | 0.79                 | 17.14                |
| Lurasidone vs. Aripiprazole | 0.54                 | 0.08                 | 3.54                 |
| Lurasidone vs. Asenapine    | 0.64                 | 0.09                 | 4.64                 |
| Lurasidone vs. Clozapine    | 0.12                 | 0.00                 | 5.56                 |
| Lurasidone vs. Olanzapine   | 0.14                 | 0.00                 | 1.96                 |
| Lurasidone vs. Paliperidone | 0.43                 | 0.05                 | 3.02                 |
| Lurasidone vs. Quetiapine   | 0.35                 | 0.05                 | 2.69                 |
| Lurasidone vs. Risperidone  | 0.31                 | 0.02                 | 3.10                 |
| Lurasidone vs. Ziprasidone  | 0.59                 | 0.07                 | 4.69                 |

Note. No differences in conclusions from the fixed effects base case analysis.

Table 11. Change from Baseline – Serum Glucose

| <b>Comparison</b>                 | <b>Median Change</b> | <b>95% CrI Lower</b> | <b>95% CrI Upper</b> |
|-----------------------------------|----------------------|----------------------|----------------------|
| Aripiprazole vs. Placebo          | 3.53                 | -1.66                | 8.84                 |
| Asenapine vs. Placebo             | 3.56                 | -1.38                | 8.54                 |
| Lurasidone vs. Placebo            | 1.67                 | -3.50                | 6.88                 |
| Olanzapine vs. Placebo            | 4.51                 | -1.70                | 10.72                |
| Paliperidone vs. Placebo          | 6.11                 | -1.57                | 14.00                |
| Quetiapine vs. Placebo            | 0.85                 | -4.21                | 5.98                 |
| Ziprasidone vs. Placebo           | -5.93                | -13.23               | 1.37                 |
| Lurasidone vs. Aripiprazole       | -1.86                | -9.31                | 5.45                 |
| Lurasidone vs. Asenapine          | -1.91                | -9.05                | 5.28                 |
| Lurasidone vs. Olanzapine         | -2.83                | -10.92               | 5.28                 |
| Lurasidone vs. Paliperidone       | -4.44                | -13.95               | 4.87                 |
| Lurasidone vs. Quetiapine         | 0.83                 | -6.53                | 8.09                 |
| <b>Lurasidone vs. Ziprasidone</b> | <b>7.63</b>          | <b>-1.35</b>         | <b>16.56</b>         |

Note. One difference in conclusion from the fixed effects base case analysis: lurasidone vs. ziprasidone went from being statistically significant to statistically insignificant.

Table 12. Change from Baseline – Total Cholesterol

| <b>Comparison</b>           | <b>Median Change</b> | <b>95% CrI Lower</b> | <b>95% CrI Upper</b> |
|-----------------------------|----------------------|----------------------|----------------------|
| Aripiprazole vs. Placebo    | 4.26                 | -3.01                | 11.51                |
| Asenapine vs. Placebo       | 9.10                 | 1.73                 | 16.44                |
| Lurasidone vs. Placebo      | 8.94                 | 1.27                 | 16.90                |
| Olanzapine vs. Placebo      | 8.54                 | -1.09                | 18.18                |
| Paliperidone vs. Placebo    | 9.83                 | -0.76                | 20.45                |
| Quetiapine vs. Placebo      | 15.60                | 7.30                 | 24.05                |
| Ziprasidone vs. Placebo     | -2.98                | -11.49               | 5.48                 |
| Lurasidone vs. Aripiprazole | 4.72                 | -5.79                | 15.38                |
| Lurasidone vs. Asenapine    | -0.13                | -10.79               | 10.64                |
| Lurasidone vs. Olanzapine   | 0.38                 | -11.93               | 12.98                |
| Lurasidone vs. Paliperidone | -0.90                | -13.83               | 12.53                |
| Lurasidone vs. Quetiapine   | -6.71                | -17.96               | 5.01                 |
| Lurasidone vs. Ziprasidone  | 11.97                | 0.46                 | 23.65                |

Note. No differences in conclusions from the fixed effects base case analysis.

Table 13. Change from Baseline – Triglycerides

| <b>Comparison</b>           | <b>Median Change</b> | <b>95% CrI Lower</b> | <b>95% CrI Upper</b> |
|-----------------------------|----------------------|----------------------|----------------------|
| Aripiprazole vs. Placebo    | 3.61                 | -9.79                | 17.21                |
| Asenapine vs. Placebo       | 8.21                 | -9.79                | 26.63                |
| Lurasidone vs. Placebo      | 4.22                 | -10.19               | 18.90                |
| Olanzapine vs. Placebo      | 37.01                | 12.27                | 61.74                |
| Paliperidone vs. Placebo    | 11.54                | -7.94                | 30.78                |
| Quetiapine vs. Placebo      | 21.58                | 4.27                 | 38.31                |
| Ziprasidone vs. Placebo     | 8.82                 | -17.58               | 35.17                |
| Lurasidone vs. Aripiprazole | 0.46                 | -19.19               | 20.73                |
| Lurasidone vs. Asenapine    | -4.04                | -27.10               | 18.93                |
| Lurasidone vs. Olanzapine   | -32.75               | -61.30               | -4.19                |
| Lurasidone vs. Paliperidone | -7.32                | -31.41               | 17.35                |
| Lurasidone vs. Quetiapine   | -17.32               | -39.96               | 5.07                 |
| Lurasidone vs. Ziprasidone  | -4.54                | -35.25               | 25.65                |

Note. No differences in conclusions from the fixed effects base case analysis.
